# Supplementary material for: An artificial protein cage made from a 12-membered ring
Source: Royal Society of Chemistry journal article supplement (doi:10.1039/d3tb01659e), 2023-12-13
Supplement: d3tb01659e1.pdf [file d3tb01659e1.pdf]

**An Artificial Protein Cage Made from a 12-Membered Ring**

**Electronic Supplementary Information (ESI)**

Izabela Stupka<sup>1,2,#</sup>, Artur P. Biela<sup>1,3\*</sup>, Bernard Piette<sup>4</sup>, Agnieszka Kowalczyk<sup>1,5</sup>, Karolina Majsterkiewicz<sup>1,2</sup>, Kinga Borzęcka-Solarz<sup>1</sup>, Antonina Naskalska<sup>1</sup>, Jonathan G. Heddle<sup>1\$\*</sup>

<sup>1</sup> Malopolska Centre of Biotechnology, Jagiellonian University, Krakow, Poland

<sup>2</sup> Postgraduate School of Molecular Medicine, Warsaw, Poland

<sup>3</sup> Institute of Zoology and Biomedical Research, Jagiellonian University, Krakow, Poland

<sup>4</sup> Department of Mathematical Sciences, Durham University, Durham, UK

<sup>5</sup> Faculty of Mathematics and Computer Science, Jagiellonian University, Krakow, Poland

#Current address: nCage Therapeutics, Krakow, Poland

\$Current address: Department of Biosciences, Durham University, Durham, UK

\* To whom correspondence should be addressed. artur.biela@uj.edu.pl,  
jonathan.g.heddle@durham.ac.uk

## Table of Contents

|                                                                                                                                                                          |    |
|--------------------------------------------------------------------------------------------------------------------------------------------------------------------------|----|
| Supplementary Tables .....                                                                                                                                               | 3  |
| Table S1. Comparison of the stability of $^{11}\text{TRAP}_{24}$ , $^{11}\text{TRAP}_{12}$ and $^{12}\text{TRAP}_{12}$ -cages .....                                      | 3  |
| Table S2. A selection of results of theoretical protein cages produced from TRAP rings containing different numbers of monomers .....                                    | 4  |
| Table S3. A selection of results of theoretical protein cages produced from TRAP rings containing 12 monomers .....                                                      | 5  |
| Table S2 and S3 Notes .....                                                                                                                                              | 6  |
| Table S4. Discarded models. Table includes an explanation of why some cages deemed invalid and not included in the shortlist of likely cages (as shown in Table S1)..... | 7  |
| Table S5. Plasmids and amino acid sequences .....                                                                                                                        | 15 |
| Table S6. Cryo-EM data collection statistics .....                                                                                                                       | 16 |
| Supplementary Movie 1. ....                                                                                                                                              | 16 |
| References .....                                                                                                                                                         | 16 |
| Supplementary Figures.....                                                                                                                                               | 17 |
| Fig. S1. Confirmation of $^{12}\text{TRAP}$ –cage formation .....                                                                                                        | 17 |
| Fig. S2. Confirmation of $^{11}\text{TRAP}_{12}$ formation.....                                                                                                          | 18 |
| Fig. S3. Stability of $^{12}\text{TRAP}$ –cage. ....                                                                                                                     | 19 |
| Fig. S4. Procedure for cryo-EM reconstruction of Au-TPPMS 12-mer TRAP cage. ....                                                                                         | 20 |
| Fig. S5. Procedure for cryo-EM reconstruction of Au-TPPMS $^{11}\text{TRAP}_{12}$ . ....                                                                                 | 21 |
| Fig. S6. Connection Maps between rings in TRAP-cages. ....                                                                                                               | 22 |
| Fig. S7. Local resolution estimation of 12-ring TRAP-cages. ....                                                                                                         | 23 |
| Fig. S8. Radius colouring of 12-ring TRAP cages. ....                                                                                                                    | 24 |

## Supplementary Tables

**Table S1.** Comparison of the stability of  $^{11}\text{TRAP}_{24}$ ,  $^{11}\text{TRAP}_{12}$  and  $^{12}\text{TRAP}_{12}$ -cages

|                            | $^{11}\text{TRAP}_{24}$ * | $^{11}\text{TRAP}_{12}$ ** | $^{12}\text{TRAP}_{12}$ |
|----------------------------|---------------------------|----------------------------|-------------------------|
| Temperature (°C), 10 min   | >120                      | 70                         | 80                      |
| pH range                   | 3-12                      | 4-11                       | 5-10                    |
| Urea (M)                   | >7                        | 3                          | 3                       |
| Gnd-HCl (M)                | 4                         | 2                          | 1                       |
| SDS (%)                    | >3                        | >3                         | <0.05                   |
| DTT (mM)                   | 0.7                       | 0.7                        | 1                       |
| TCEP (mM)                  | 0.07                      | 0.07                       | 0.01                    |
| Glutathione, reduced (mM)  | 0.7                       | 0.7                        | 1                       |
| Glutathione, oxidized (mM) | >70                       | >70                        | >10                     |

\* - values from<sup>1</sup>

\*\* - values from<sup>2</sup>

| name of the structure                                                                                           | #faces and their polygonality | underlying topological structure (symmetry) | $\Delta_l$ | $\Delta_\alpha$ | dihedral $\alpha$                                                                   | types and number of holes    |  | chirality | equivalent faces; #adjacent faces | #bonds; saturated faces | structure diameter to face diameter ratio |
|-----------------------------------------------------------------------------------------------------------------|-------------------------------|---------------------------------------------|------------|-----------------|-------------------------------------------------------------------------------------|------------------------------|--|-----------|-----------------------------------|-------------------------|-------------------------------------------|
| <b>Aco_P10_1_2_1_2</b><br>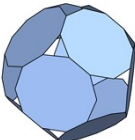     | 12x10-gons                    | cuboctahedron                               | 0.001%     | 0.51%           | 120°                                                                                | 8 triangular, 6 four-fold    |  | no        | yes; 4                            | 48; no                  | 1.914                                     |
| <b>Pic_P10_1_1_1_1</b><br>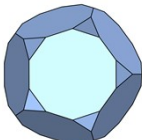     | 12x10-gons                    | icosahedron                                 | 0%         | 0%              | 116.565°                                                                            | 20 triangular                |  | no        | yes; 5                            | 60; yes                 | 1.835                                     |
| <b>Aco_P11_1_2_1_3</b><br>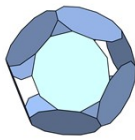     | 12x11-gons                    | cuboctahedron                               | 1.76%      | 1.806%          | 119.393°                                                                            | 8 triangular, 6 bowtie       |  | no        | yes; 4                            | 48; no                  | 1.916                                     |
| <b>Aco_P13_2_2_2_3</b><br>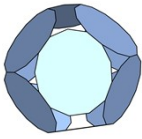    | 12x13-gons                    | cuboctahedron                               | 2.698%     | 2.698%          | 119.46°                                                                             | 8 tripod-like, 6 bowtie      |  | no        | yes; 4                            | 48; no                  | 1.862                                     |
| <b>Pic_P13_1_2_1_2_2</b><br>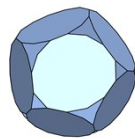 | 12x13-gons                    | icosahedron                                 | 5.61%      | 5.611%          | 120.572° (between faces adjacent to two tripod-like holes) 115.499° (all the other) | 8 triangular, 12 tripod-like |  | no        | yes; 5                            | 60; no                  | 1.782                                     |

**Table S2.** A selection of results of theoretical protein cages produced from TRAP rings containing different numbers of monomers

**Table S3.** A selection of results of theoretical protein cages produced from TRAP rings containing 12 monomers

| name of the structure                                                                                           | #faces and their polygonality | underlying topological structure (symmetry) | $\Delta_l$ | $\Delta_\alpha$ | dihedral $\alpha$                                                                           | types and number of holes    | chirality | equivalent faces; #adjacent faces | #bonds; saturated faces | structure diameter to face diameter ratio |
|-----------------------------------------------------------------------------------------------------------------|-------------------------------|---------------------------------------------|------------|-----------------|---------------------------------------------------------------------------------------------|------------------------------|-----------|-----------------------------------|-------------------------|-------------------------------------------|
| <b>Aco_P12_1_2_1_4</b><br>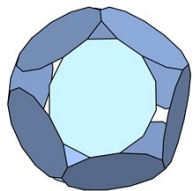     | 12x12-gons                    | cuboctahedron                               | 3.805%     | 3.805%          | 117.875°                                                                                    | 8 triangular, 6 bowtie       | no        | yes; 4                            | 48; no                  | 1.842                                     |
| <b>Aco_P12_1_3_1_3</b><br>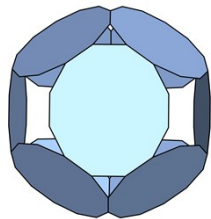    | 12x12-gons                    | cuboctahedron                               | 0%         | 1,7%            | 120°                                                                                        | 8 triangular, 6 bowtie       | no        | Yes; 4                            | 48; no                  | 1.901                                     |
| <b>Pic_P12_2_1_2_1_1</b><br>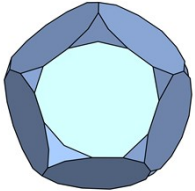 | 12x12-gons                    | icosahedron                                 | 6.157%     | 6.157%          | 111.836° (between faces adjacent to two small triangular holes)<br>117.654° (all the other) | 12 triangular, 8 tripod-like | no        | yes; 5                            | 60; no                  | 1.906                                     |

### Table S2 and S3 Notes

**Name of the structure** - a notation is made out of three parts SYM\_PN\_QI, where PN is the letter P followed by the number of edges of the cage faces; SYM refers to the underlying topological structure (Pic for Platonic icosahedron, Aco for Archimedean cuboctahedron) from which the cage is constructed; QI refers to the sequence of edges (separated by the symbol '\_' ) that each face contributes to the adjacent holes. More details can be found in<sup>3</sup>.

**Relative errors  $\Delta_l$  (for edge lengths),  $\Delta_\alpha$  (for face planar angles)** – deviations from regularity are expressed as relative deformations and defined as the largest absolute value of the difference between the edge lengths (angles) and the average edge length (angle), divided by the average value. More details can be found in<sup>3,4</sup>.

**Equivalent faces** - every face can be mapped onto any other face by means of proper rotations; every face “is the same”. More details can be found in<sup>3,4</sup>.

**#bonds** – number of glued edges between the faces x 2; number of chemical bonds that can be present in an actual cage

**Saturated faces** – faces that are adjacent to the maximal number of other faces of the same type under the condition that no two consecutive face edges are glued to another face or faces.

**Structure diameter to face diameter ratio** – ration between the diameter of the structure to the diameter of the regular face.

**Table S4.** Discarded models. Table includes an explanation of why some cages deemed invalid and not included in the shortlist of likely cages (as shown in Table S1)

| #          | name of the structure | underlying topological structure (symmetry) | $\Delta_l$ | $\Delta_\alpha$ | dihedral $\alpha$                                                                                | types and number of holes                                                | chirality | equivalent faces; #adjacent faces | #bonds; saturated faces | structure diameter to face diameter ratio | comment                                             |
|------------|-----------------------|---------------------------------------------|------------|-----------------|--------------------------------------------------------------------------------------------------|--------------------------------------------------------------------------|-----------|-----------------------------------|-------------------------|-------------------------------------------|-----------------------------------------------------|
| 12x10-gons |                       |                                             |            |                 |                                                                                                  |                                                                          |           |                                   |                         |                                           |                                                     |
| 1          | Att_P10_1_3_3         | truncated tetrahedron                       | 0%         | 0%              | 63.4°(between faces adjacent to a triangular hole), 145.3° (all the other)                       | 4 triangular, 4 three-fold (between six faces)                           | no        | yes; 3                            | 36; no                  | 2.377                                     | too large 3-fold holes                              |
| 2          | hp_P10_3_2_2          | hexagonal prism                             | 0%         | 0%              | 131.2° (between faces adjacent to a six-fold hole), 111.5° (all the other)                       | 6 two-fold, 2 six-fold                                                   | no        | yes; 3                            | 36; no                  | 2.288                                     | too large 6-fold holes                              |
| 3          | Att_P10_1_2_4         | truncated tetrahedron                       | 1.33%      | 1.33%           | 126.288°(between faces adjacent to a triangular hole), 127.225°(all the other)                   | 4 triangular, 4 three-fold (between six faces)                           | yes       | yes; 3                            | 36; no                  | 2.126                                     | too large 3-fold holes                              |
| 4          | ha_P10_3_1_1_1        | hexagonal antiprism                         | 4.357%     | 4.358%          | 126.817-126.831° (between faces adjacent to a six-fold hole), 119.68-119.69° (all the other)     | 12 triangular holes, 2 six-fold                                          | no        | yes; 4                            | 48; no                  | 2.127                                     | too large 6-fold holes                              |
| 5          | hp_P10_3_1_3          | hexagonal prism                             | 4.731%     | 3.435%          | 125.931- 125.934° (between faces adjacent to a six-fold hole), 122.516- 122.518° (all the other) | 6 two-fold (they seem to be 12 triangular holes but are not), 2 six-fold | yes       | yes; 3                            | 36; no                  | 2.084                                     | too large 6-fold holes                              |
| 6          | hp_P10_2_2_3          | hexagonal prism                             | 8.02%      | 8.02%           | 160.738- 160.741°(between faces adjacent to a six-fold hole), 38.864° (all the other)            | 6 two-fold, 2 six-fold                                                   | yes       | yes; 3                            | 36; no                  | 2.636                                     | too large 6-fold holes, too flat structure globally |
| 12x11-gons |                       |                                             |            |                 |                                                                                                  |                                                                          |           |                                   |                         |                                           |                                                     |
| 1          | hp_P11_4_2_2          | hexagonal prism                             | 0%         | 0%              | 57.9°(between faces adjacent to a six-fold hole), 151.2° (all the other)                         | 6 two-fold, 2 six-fold                                                   | no        | yes; 3                            | 36; no                  | 2.403                                     | too large 6-fold holes                              |
| 2          | Att_P11_1_3_4         | truncated tetrahedron                       | 0.508%     | 0.508%          | 130.842- 130.846°(between faces adjacent to a triangular hole), 126.749- 126.753°(all the other) | 4 triangular, 4 three-fold (between six faces)                           | yes       | yes; 3                            | 36; no                  | 2.280                                     | too large 3-fold holes                              |
| 3          | Aco_P11_1_2_2_2       | cuboctahedron                               | 0.041%     | 1.493%          | 84.44-84.46° (between faces                                                                      | 4 triangular, 6 two-                                                     | no        | yes; 4                            | 48; no                  | 2.280                                     | not                                                 |

|    |                |                       |        |        |                                                                                                  |                                                                          |     |        |        |       |                                                                                       |
|----|----------------|-----------------------|--------|--------|--------------------------------------------------------------------------------------------------|--------------------------------------------------------------------------|-----|--------|--------|-------|---------------------------------------------------------------------------------------|
|    |                |                       |        |        | adjacent to a three-fold hole), other in the range of 159.65-159.67°                             | fold, 4 three-fold                                                       |     |        |        |       | spherical in shape enough, too flat locally                                           |
| 4  | Att_P11_1_2_5  | truncated tetrahedron | 1.176% | 1.176% | all in the range of 124.181-124.243 °                                                            | 4 triangular, 4 three-fold (between six faces)                           | yes | yes; 3 | 36; no | 2.087 | less bonds between the faces in comparison with <b>Aco_P11_1_2_1_3</b>                |
| 5  | Att_P11_2_3_3  | truncated tetrahedron | 2.5%   | 2.502% | 88.655- 91.25 ° (between faces adjacent to a star-shaped hole), 179.99-180° (all the other)      | 4 three-fold star-shaped between 3 faces, 4 three-fold between six faces | no  | yes; 3 | 36; no | 2.497 | too large 3-fold holes                                                                |
| 6  | hp_P11_4_1_3   | hexagonal prism       | 3.237% | 3.237% | 124.815- 124.819°(between faces adjacent to a six-fold hole), 127.337° (all the other)           | 6 two-fold (they seem to be 12 triangular holes but are not), 2 six-fold | yes | yes; 3 | 36; no | 2.117 | too large 6-fold holes                                                                |
| 7  | ha_P11_4_1_1_1 | hexagonal antiprism   | 4.179% | 4.178% | 124.828°(between faces adjacent to a six-fold hole), 126.914°(all the other)                     | 12 triangular holes, 2 six-fold                                          | no  | yes; 4 | 48; no | 2.104 | too large 6-fold holes                                                                |
| 8  | hp_P11_3_2_3   | hexagonal prism       | 4.826% | 4.827% | 138.917- 138.924°(between faces adjacent to a six-fold hole), 88.362- 88.363°(all the other)     | 6 two-fold, 2 six-fold                                                   | yes | yes; 3 | 36; no | 2.451 | too large 6-fold holes, too flat structure globally                                   |
| 9  | Att_P11_2_1_5  | truncated tetrahedron | 7.479% | 7.479% | 121.294-121.3° (between faces adjacent to a star-shaped hole), 114.378- 114.383° (all the other) | 4 three-fold star-shaped, 4 three-fold (between six faces)               | yes | yes; 3 | 36; no | 1.811 | much larger deformation than in <b>Aco_P11_1_2_1_3</b>                                |
| 10 | hp_P11_2_3_3   | hexagonal prism       | 7.647% | 7.647% | 154.244- 154.248°(between faces adjacent to a six-fold hole), 52.938- 52.939° (all the other)    | 6 two-fold, 2 six-fold                                                   | no  | yes; 3 | 36; no | 2.597 | too large 6-fold holes, too flat structure globally + much larger deformation than in |

|                   |                        |                       |        |        |                                                                                                     |                                                                                          |     |        |        |       |                                                        |
|-------------------|------------------------|-----------------------|--------|--------|-----------------------------------------------------------------------------------------------------|------------------------------------------------------------------------------------------|-----|--------|--------|-------|--------------------------------------------------------|
|                   |                        |                       |        |        |                                                                                                     |                                                                                          |     |        |        |       | <b>Aco_P11_1_2_1_3</b>                                 |
| <b>11</b>         | <b>Aco_P11_2_1_2_2</b> | cuboctahedron         | 8.688% | 8.69%  | all in the range of 119.166-119.173 °                                                               | 8 three-fold, 6 bowtie                                                                   | no  | yes; 4 | 48; no | 1.757 | much larger deformation than in <b>Aco_P11_1_2_1_3</b> |
| <b>12</b>         | <b>Att_P11_2_2_4</b>   | truncated tetrahedron | 9.01%  | 9.011% | 125.081- 125.122° (between faces adjacent to a star-shaped hole), 129.453- 129.491° (all the other) | 4 three-fold star-shaped hole between 3 faces, 4 three-fold between six faces            | yes | yes; 3 | 36; no | 2.042 | much larger deformation than in <b>Aco_P11_1_2_1_3</b> |
| <b>13</b>         | <b>Aco_P11_1_1_2_3</b> | cuboctahedron         | 9.391% | 9.391% | 118.059°(between faces adjacent to a three-fold hole), 116.453°(all the other)                      | 4 triangular, 4 three-fold, 6 two-fold (they seem to be 12 triangular holes but are not) | no  | yes; 4 | 48; no | 1.817 | much larger deformation than in <b>Aco_P11_1_2_1_3</b> |
| <b>12x12-gons</b> |                        |                       |        |        |                                                                                                     |                                                                                          |     |        |        |       |                                                        |
| <b>1</b>          | <b>Att_P12_1_4_4</b>   | truncated tetrahedron | 0%     | 0%     | 180° between faces adjacent to a triangular hole, 70.52° (all the other)                            | 4 triangular, 4 three-fold (between six faces)                                           | no  | yes; 3 | 36; no | 2.551 | too large 3-fold holes, too flat locally               |
| <b>2</b>          | <b>Aco_P12_1_2_3_2</b> | cuboctahedron         | 0%     | 0%     | 180° between faces adjacent to a triangular hole, 70.52° (all the other)                            | 4 triangular, 6 two-fold, 4 three-fold                                                   | no  | yes; 4 | 48; no | 2.358 | not spherical in shape enough, too flat locally        |
| <b>3</b>          | <b>hp_P12_5_2_2</b>    | hexagonal prism       | 0%     | 0%     | 60°(between faces adjacent to a six-fold hole), 180° (all the other)                                | 6 two-fold, 2 six-fold                                                                   | no  | yes; 3 | 36; no | 2.579 | too large 6-fold holes, too flat locally               |
| <b>4</b>          | <b>hp_P12_3_3_3</b>    | hexagonal prism       | 0%     | 0%     | 180° (between faces adjacent to a six-fold hole), all the other 0°                                  | 6 two-fold, 2 six-fold                                                                   | no  | yes; 3 | 36; no | 2.903 | globally flat structure                                |
| <b>5</b>          | <b>hp_P12_4_2_3</b>    | hexagonal prism       | 0.401% | 0.401% | 127.079°(between faces adjacent to a six-fold hole), 124.511° (all the other)                       | 6 two-fold, 2 six-fold                                                                   | yes | yes; 3 | 36; no | 2.178 | too large 6-fold holes                                 |
| <b>7</b>          | <b>Aco_P12_2_2_2_2</b> | cuboctahedron         | 0.001% | 4.326% | all in the range of 119.998-120.002°                                                                | 8 three-fold, 6 four-fold                                                                | no  | yes; 4 | 48; no | 1.906 | too large 3-fold holes                                 |
| <b>8</b>          | <b>Att_P12_1_3_5</b>   | truncated             | 2.316% | 2.317% | 130.077- 130.091° (between                                                                          | 4 triangular, 4 three-                                                                   | yes | yes; 3 | 36; no | 2.214 | too large 3-                                           |

|    |                 |                       |        |        |                                                                                                   |                                                                               |     |        |        |       |                                                                                        |
|----|-----------------|-----------------------|--------|--------|---------------------------------------------------------------------------------------------------|-------------------------------------------------------------------------------|-----|--------|--------|-------|----------------------------------------------------------------------------------------|
|    |                 | tetrahedron           |        |        | faces adjacent to a triangular hole), 124.858- 124.878° (all the other)                           | fold (between six faces)                                                      |     |        |        |       | fold holes                                                                             |
| 9  | Att_P12_2_2_5   | truncated tetrahedron | 5.804% | 5.804% | 126.133- 126.141°(between faces adjacent to a star-shaped hole), 123.42- 123.43° (all the other)  | 4 three-fold star-shaped hole between 3 faces, 4 three-fold between six faces | yes | yes; 3 | 36; no | 2.004 | less bonds between the faces and larger deformation in comparison with Aco_P12_1_2_1_4 |
| 10 | Aco_P12_2_1_2_3 | cuboctahedron         | 4.266% | 6.357% | all in the range of 117.742- 117.744°                                                             | 8 three-fold, 6 two-fold (they seem to be 12 triangular holes but are not)    | no  | yes; 4 | 48; no | 1.900 | larger deformation than Aco_P12_1_2_1_4                                                |
| 11 | Aco_P12_1_2_2_3 | cuboctahedron         | 6.439% | 6.439% | 95.60- 95.61° (between faces adjacent to a three-fold hole), 145.391- 145.396° (all the other)    | 4 triangular, 6 two-fold, 4 three-fold                                        | yes | yes; 4 | 48; no | 2.079 | larger deformation than Aco_P12_1_2_1_4 and Pic_P12_2_1_2_1_1                          |
| 12 | Att_P12_2_3_4   | truncated tetrahedron | 6.895% | 6.901% | 101.322- 101.341°(between faces adjacent to a star-shaped hole), 164.15- 164.174° (all the other) | 4 three-fold star-shaped hole between 3 faces, 4 three-fold between six faces | yes | yes; 3 | 36; no | 2.297 | larger deformation than Aco_P12_1_2_1_4 and Pic_P12_2_1_2_1_1                          |
| 13 | Att_P12_3_3_3   | truncated tetrahedron | 8.017% | 8.29%  | 89.572- 90.391°(between faces adjacent to a star-shaped hole), 179.991- 179.994° (all the other)  | 4 three-fold star-shaped hole between 3 faces, 4 three-fold between six faces | no  | yes; 3 | 36; no | 2.300 | larger deformation than Aco_P12_1_2_1_4 and Pic_P12_2_1_2_1_1                          |

|                   |                        |                       |        |        |                                                                                                   |                                                                               |     |        |        |       |                                                                                                                                  |
|-------------------|------------------------|-----------------------|--------|--------|---------------------------------------------------------------------------------------------------|-------------------------------------------------------------------------------|-----|--------|--------|-------|----------------------------------------------------------------------------------------------------------------------------------|
|                   |                        |                       |        |        |                                                                                                   |                                                                               |     |        |        |       | <b>1_2_1_1</b>                                                                                                                   |
| <b>14</b>         | <b>hp_P12_5_1_3</b>    | hexagonal prism       | 8.236% | 8.235% | 124.179- 124.195°(between faces adjacent to a six-fold hole), 130.495- 130.498° (all the other)   | 6 two-fold (they seem to be 12 triangular holes but are not), 2 six-fold      | yes | yes; 3 | 36; no | 2.112 | too large 6-fold holes, larger deformation than <b>Aco_P12_1_2_1_4</b> and <b>Pic_P12_2_1_2_1_1</b>                              |
| <b>15</b>         | <b>hp_P12_3_2_4</b>    | hexagonal prism       | 9.466% | 9.466% | 142.274- 142.28°(between faces adjacent to a six-fold hole), 78.769- 78.771° (all the other)      | 6 two-fold, 2 six-fold                                                        | yes | yes; 3 | 36; no | 2.429 | too large 6-fold holes, too flat structure globally; larger deformation than <b>Aco_P12_1_2_1_4</b> and <b>Pic_P12_2_1_2_1_1</b> |
| <b>12x13-gons</b> |                        |                       |        |        |                                                                                                   |                                                                               |     |        |        |       |                                                                                                                                  |
| <b>1</b>          | <b>Att_P13_2_4_4</b>   | truncated tetrahedron | 0%     | 0%     | 82.1° (between faces adjacent to a star-shaped hole), 169.2° (all the other)                      | 4 three-fold star-shaped hole between 3 faces, 4 three-fold between six faces | no  | yes; 3 | 36; no | 2.566 | too large 3-fold holes, too flat locally                                                                                         |
| <b>2</b>          | <b>hp_P13_4_3_3</b>    | hexagonal prism       | 0%     | 0%     | 135.7° (between faces adjacent to a six-fold hole), 82.1° (all the other)                         | 6 two-fold, 2 six-fold                                                        | no  | yes; 3 | 36; no | 2.466 | too large 6-fold holes                                                                                                           |
| <b>3</b>          | <b>Aco_P13_1_3_2_3</b> | cuboctahedron         | 0.021% | 2.357% | 93.359- 93.372° (between faces adjacent to a star-shaped hole), 148.707- 148.724° (all the other) | 4 triangular, 6 two-fold, 4 three-fold star-shaped                            | no  | yes; 4 | 48; no | 2.204 | less spherical in shape than <b>Aco_P13_2_2_2_3</b> and <b>Aco_P13_2_2_2_3</b>                                                   |

|   |                 |                       |        |        |                                                                                                    |                                                                               |     |        |        |       |                                                                                      |
|---|-----------------|-----------------------|--------|--------|----------------------------------------------------------------------------------------------------|-------------------------------------------------------------------------------|-----|--------|--------|-------|--------------------------------------------------------------------------------------|
|   |                 |                       |        |        |                                                                                                    |                                                                               |     |        |        |       | 2_2_3 can be optimized to get similar distortion to this structure                   |
| 4 | Att_P13_1_4_5   | truncated tetrahedron | 2.404% | 2.414% | 147.885- 148.119° (between faces adjacent to a triangular hole), 107.064- 107.272° (all the other) | 4 triangular, 4 three-fold (between six faces)                                | yes | yes; 3 | 36; no | 2.415 | too large 3-fold holes                                                               |
| 5 | Att_P13_2_2_6   | truncated tetrahedron | 3.351% | 3.35%  | 123.559- 123.563°(between faces adjacent to a star-shaped hole), 120.866- 120.871° (all the other) | 4 three-fold star-shaped hole between 3 faces, 4 three-fold between six faces | yes | yes; 3 | 36; no | 1.985 | less bonds between the faces and larger deformation in comparison with Aco_P13_2_2_3 |
| 6 | Aco_P13_2_2_3_2 | cuboctahedron         | 2.583% | 5.066% | 79.078- 79.082° (between faces adjacent to a two-fold hole), 166.852- 166.859° (all the other)     | 8 three-fold (two groups of 4 of different shape), 6 two-fold                 | no  | yes; 4 | 48; no | 2.161 | too flat locally, larger angle deformation than Aco_P13_2_2_3                        |
| 7 | hp_P13_4_2_4    | hexagonal prism       | 3.994% | 3.994% | 128.758- 128.761°(between faces adjacent to a six-fold hole), 115.485° (all the other)             | 6 two-fold, 2 six-fold                                                        | yes | yes; 3 | 36; no | 2.201 | too large 6-fold holes                                                               |
| 8 | hp_P13_5_2_3    | hexagonal prism       | 4.004% | 4.004% | 123.309- 123.424°(between faces adjacent to a six-fold hole), 141.686- 141.696 ° (all the other)   | 6 two-fold, 2 six-fold                                                        | yes | yes; 3 | 36; no | 2.290 | too large 6-fold holes                                                               |
| 9 | Att_P13_1_3_6   | truncated tetrahedron | 4.082% | 4.082% | 127.355- 127.365° (between faces adjacent to a triangular hole), 124.276- 124.292° (all the other) | 4 triangular, 4 three-fold (between six faces)                                | yes | yes; 3 | 36; no | 2.146 | less bonds between the faces and larger deformation                                  |

|    |                 |                       |        |        |                                                                                                    |                                                                               |     |        |        |       |                                                                                                                      |
|----|-----------------|-----------------------|--------|--------|----------------------------------------------------------------------------------------------------|-------------------------------------------------------------------------------|-----|--------|--------|-------|----------------------------------------------------------------------------------------------------------------------|
|    |                 |                       |        |        |                                                                                                    |                                                                               |     |        |        |       | in comparison with <b>Aco_P13_2_2_3</b>                                                                              |
| 10 | Att_P13_2_3_5   | truncated tetrahedron | 4.212% | 4.211% | 124.078- 124.087°(between faces adjacent to a star-shaped hole), 132.415- 132.425° (all the other) | 4 three-fold star-shaped hole between 3 faces, 4 three-fold between six faces | yes | yes; 3 | 36; no | 2.160 | less bonds between the faces and larger deformation in comparison with <b>Aco_P13_2_2_3</b> + too large 3-fold holes |
| 11 | Aco_P13_1_3_1_4 | cuboctahedron         | 4.229% | 5.013% | all in the range of 119.674-119.694°                                                               | 8 triangular, 6 bowtie                                                        | no  | yes; 4 | 48; no | 1.879 | larger deformation than <b>Aco_P13_2_2_3</b>                                                                         |
| 12 | hp_P13_3_3_4    | hexagonal prism       | 5.273% | 5.271% | 162.21- 162.394°(between faces adjacent to a six-fold hole), 35.674-35.702° (all the other)        | 6 two-fold, 2 six-fold                                                        | yes | yes; 3 | 36; no | 2.748 | too large 6-fold holes, too flat structure globally                                                                  |
| 13 | Aco_P13_1_2_2_4 | cuboctahedron         | 6.163% | 6.163% | 112.223°(between faces adjacent to a star-shaped hole), 123.98° (all the other)                    | 4 triangular, 6 bowtie, 4 three-fold star shaped                              | yes | yes; 4 | 48; no | 1.945 | larger deformation than <b>Aco_P13_2_2_3</b> and <b>Pic_P13_1_2_1_2_2</b>                                            |
| 14 | hp_P13_6_2_2    | hexagonal prism       | 6.252% | 6.247% | 118.816- 120.762°(between faces adjacent to a six-fold hole), 179.997° (all the other)             | 6 two-fold, 2 six-fold                                                        | no  | yes; 3 | 36; no | 2.480 | too large 6-fold holes, too flat locally                                                                             |
| 15 | Aco_P13_1_2_4_2 | cuboctahedron         | 7.239% | 7.283% | 70.71- 71.12°(between faces adjacent to a star-shaped hole), 179.356- 179.459° (all                | 4 triangular, 6 two-fold, 4 three-fold star-shaped                            | no  | yes; 4 | 48; no | 2.204 | too flat locally, larger                                                                                             |

|           |                        |               |        |        |                                                                                                 |                                                    |     |        |        |       |                                                                                             |
|-----------|------------------------|---------------|--------|--------|-------------------------------------------------------------------------------------------------|----------------------------------------------------|-----|--------|--------|-------|---------------------------------------------------------------------------------------------|
|           |                        |               |        |        | the other)                                                                                      |                                                    |     |        |        |       | deformation than <b>Aco_P13_2_2_3</b> and <b>Pic_P13_1_2_1_2_2</b>                          |
| <b>16</b> | <b>Aco_P13_1_2_3_3</b> | cuboctahedron | 8.885% | 8.887% | 75.38- 75.385°(between faces adjacent to a star-shaped hole), 172.036- 172.041° (all the other) | 4 triangular, 6 two-fold, 4 three-fold star-shaped | yes | yes; 4 | 48; no | 2.195 | too flat locally, larger deformation than <b>Aco_P13_2_2_3</b> and <b>Pic_P13_1_2_1_2_2</b> |

**Table S5.** Plasmids and amino acid sequences

| Plasmid name                | Plasmid | Gene                  | Amino acid sequence                                                                    |
|-----------------------------|---------|-----------------------|----------------------------------------------------------------------------------------|
| pET21b_TRAP-K37C            | pET21b  | 12-mer-TRAP-K37C      | MNVGDNSNFFVIKAKENG VNVFGMT<br>RGTDTRFHHSECLDKGEVMIAQFTEH<br>TSAVKIRGKAI IQTSYGTLDTEKDE |
| pET21b_12-merTRAP-wt        | pET21b  | 12-mer-TRAP-wt        | MNVGDNSNFFVIKAKENG VNVFGMT<br>RGTDTRFHHSEKLDKGEVMIAQFTEHT<br>SAVKIRGKAI IQTSYGTLDTEKDE |
| pET21b_11-merTRAP-K35C-R64S | pET21b  | 11-mer-TRAP-K35C-R64S | MYTNSDFVVIKALEDG VNVIGLTRGAD<br>TRFHHSECLDKGEVLIAQFTEHTSAIKV<br>RGKAYIQTSHGVIESEGKK    |

**Table S6.** Cryo-EM data collection statistics

|                                                     | <sup>12</sup> TRAP <sub>12</sub> | <sup>11</sup> TRAP <sub>12</sub> |
|-----------------------------------------------------|----------------------------------|----------------------------------|
| EMDB                                                | 17196                            | 17195                            |
| <b>Data collection and processing</b>               |                                  |                                  |
| Magnification                                       | 165k                             | 175k                             |
| Voltage (kV)                                        | 300                              | 300                              |
| Electron exposure (e <sup>-</sup> /Å <sup>2</sup> ) | 40                               | 40                               |
| Defocus range (μm)                                  | 0.5-2.5                          | 0.8-2.4                          |
| Pixel size (Å)                                      | 1.065                            | 0.86                             |
| Symmetry imposed                                    | T                                | T                                |
| Initial particle images (no.)                       | 848,602                          | 1,479,225                        |
| Final particle images (no.)                         | 143,338                          | 406,311                          |
| Map resolution (Å)                                  | 7.00                             | 4.68                             |
| FSC = 0.143                                         |                                  |                                  |

**Supplementary Movie 1.**

3D variability of the <sup>12</sup>TRAP<sub>12</sub> cage showing its flexible nature. The movie is composed from 20 different states (frames representing least scattered clusters) being a result of 3D variability analysis (3DVA) morphed sequentially one into another using ChimeraX giving the impression of a “breathing” cage. All densities (frames) are contoured at the same RMSD level of 3.5.

**References**

- 1 A. D. Malay, N. Miyazaki, A. Biela, S. Chakraborti, K. Majsterkiewicz, I. Stupka, C. S. Kaplan, A. Kowalczyk, B. M. A. G. Piette, G. K. A. Hochberg, D. Wu, T. P. Wrobel, A. Fineberg, M. S. Kushwah, M. Kelemen, P. Vavpetič, P. Pelicon, P. Kukura, J. L. P. Benesch, K. Iwasaki and J. G. Heddle, *Nature*, 2019, **569**, 438–442.
- 2 K. Majsterkiewicz, A. P. Biela, S. Maity, M. Sharma, B. M. A. G. Piette, A. Kowalczyk, S. Gawęł, S. Chakraborti, W. H. Roos and J. G. Heddle, *Nano Lett.*, 2022, **22**, 3187–3195.
- 3 B. M. A. G. Piette, A. Kowalczyk and J. G. Heddle, *Proc. R. Soc. A Math. Phys. Eng. Sci.*, 2022, **478**, 20210679.
- 4 J. G. Heddle, A. Kowalczyk and B. M. A. G. Piette, in *Bridges 2019 Conference Proceedings*, Tessellations Publishing, Phoenix, Arizona, 2019, pp. 363–366.

## Supplementary Figures

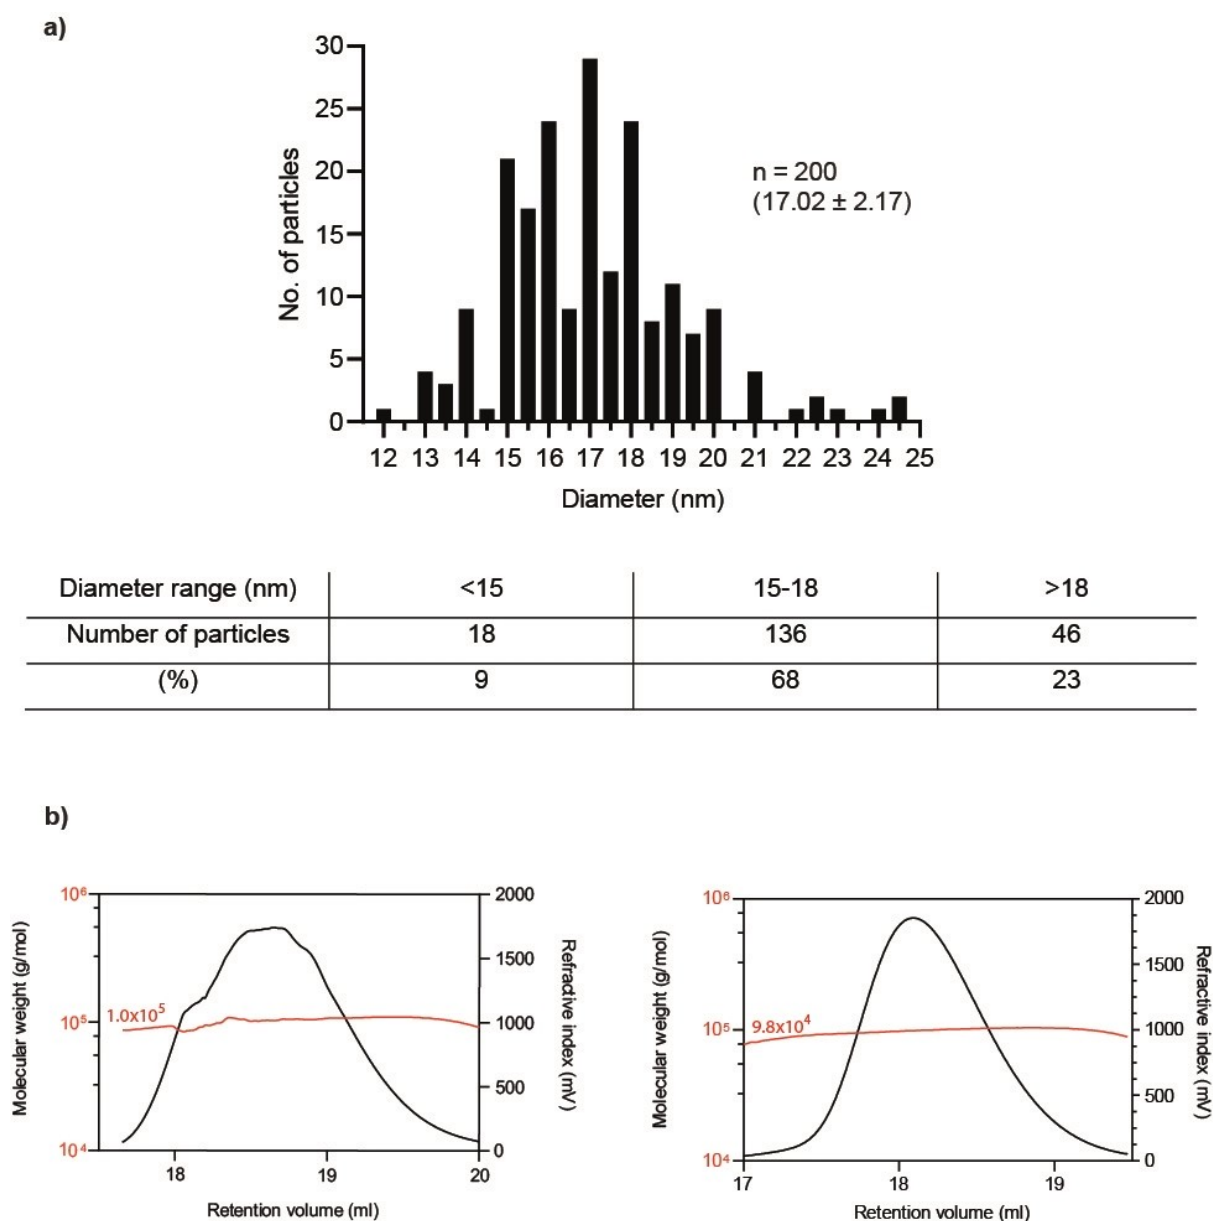

**Fig. S1. Confirmation of  $^{12}\text{TRAP}$  –cage formation (a),** Analysis of 200 particles from an electron micrograph of  $^{12}\text{TRAP}$ -cage (same sample as in Fig. 3a) indicating a mean diameter of approx. 17 nm. **(b), control showing effect of Au(I)-TPPMS on wild type  $^{12}\text{TRAP}$ -rings(wt)** Typical Refractive Index (RI) chromatogram of  $^{12}\text{TRAP}$ -rings(wt) before (left) and after (right) addition of Au(I)-TPPMS with indicated measured molecular weight.

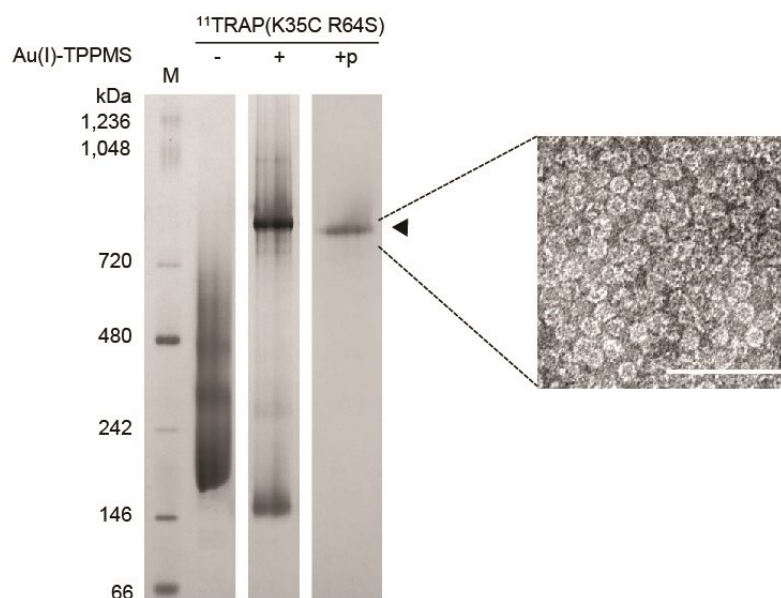

**Fig. S2. Confirmation of  $^{11}\text{TRAP}_{12}$  formation.** Dark Blue Native PAGE of 11TRAP-K35C R64S rings before and after the addition of Au(I)-TPPMS. 'p' indicates the purified sample. 'M' denotes molecular mass marker. Position of  $^{11}\text{TRAP}_{12}$  is indicated by black arrowhead. Inset: Transmission electron microscopy (TEM) image of  $^{11}\text{TRAP}_{12}$ . Scale bar, 100 nm.

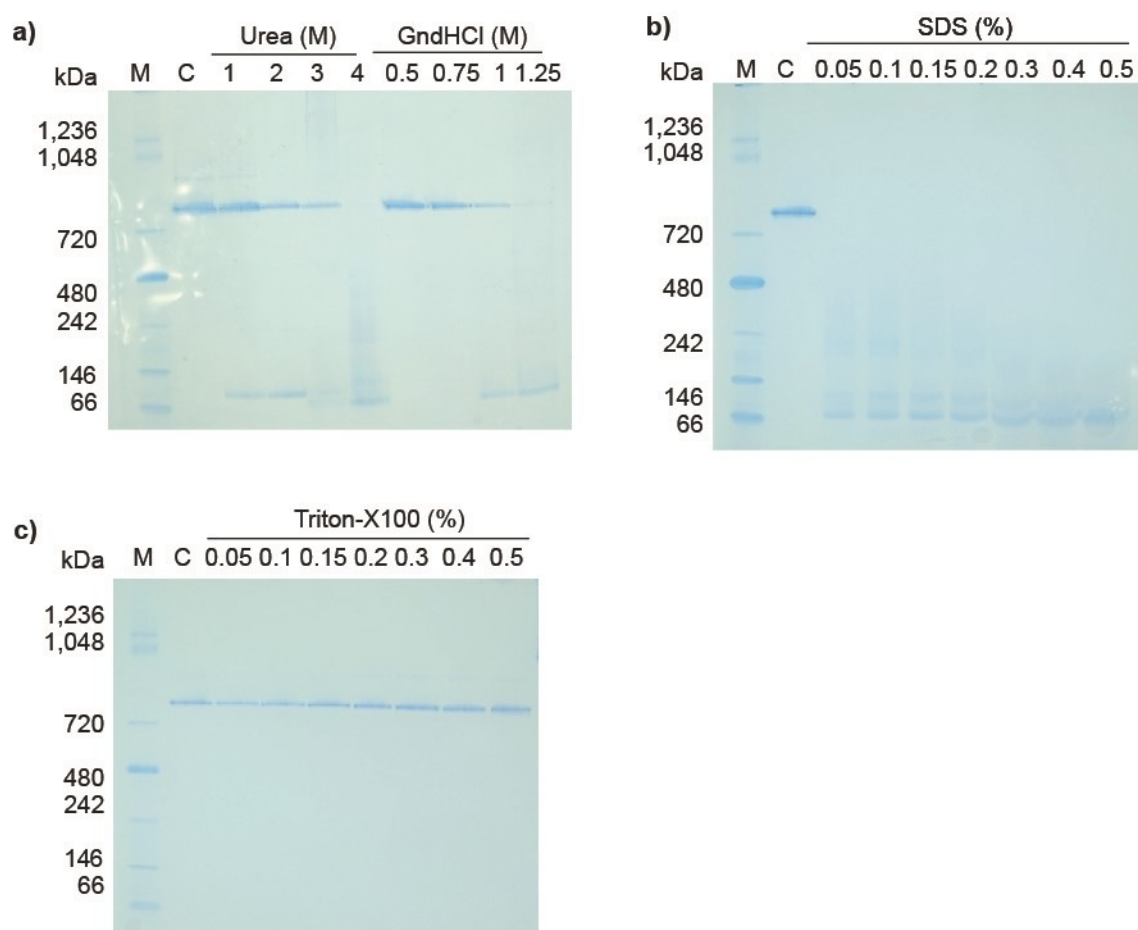

**Fig. S3. Stability of  $^{12}\text{TRAP-cage}$ .** Native PAGE analysis of  $^{12}\text{TRAP-cage}$  stability in the presence of urea, guanidine hydrochloride (GndHCl) (a), SDS (b) and Triton X-100 (c). "C" denotes  $^{12}\text{TRAP-cage}$ . "M", molecular weight marker.

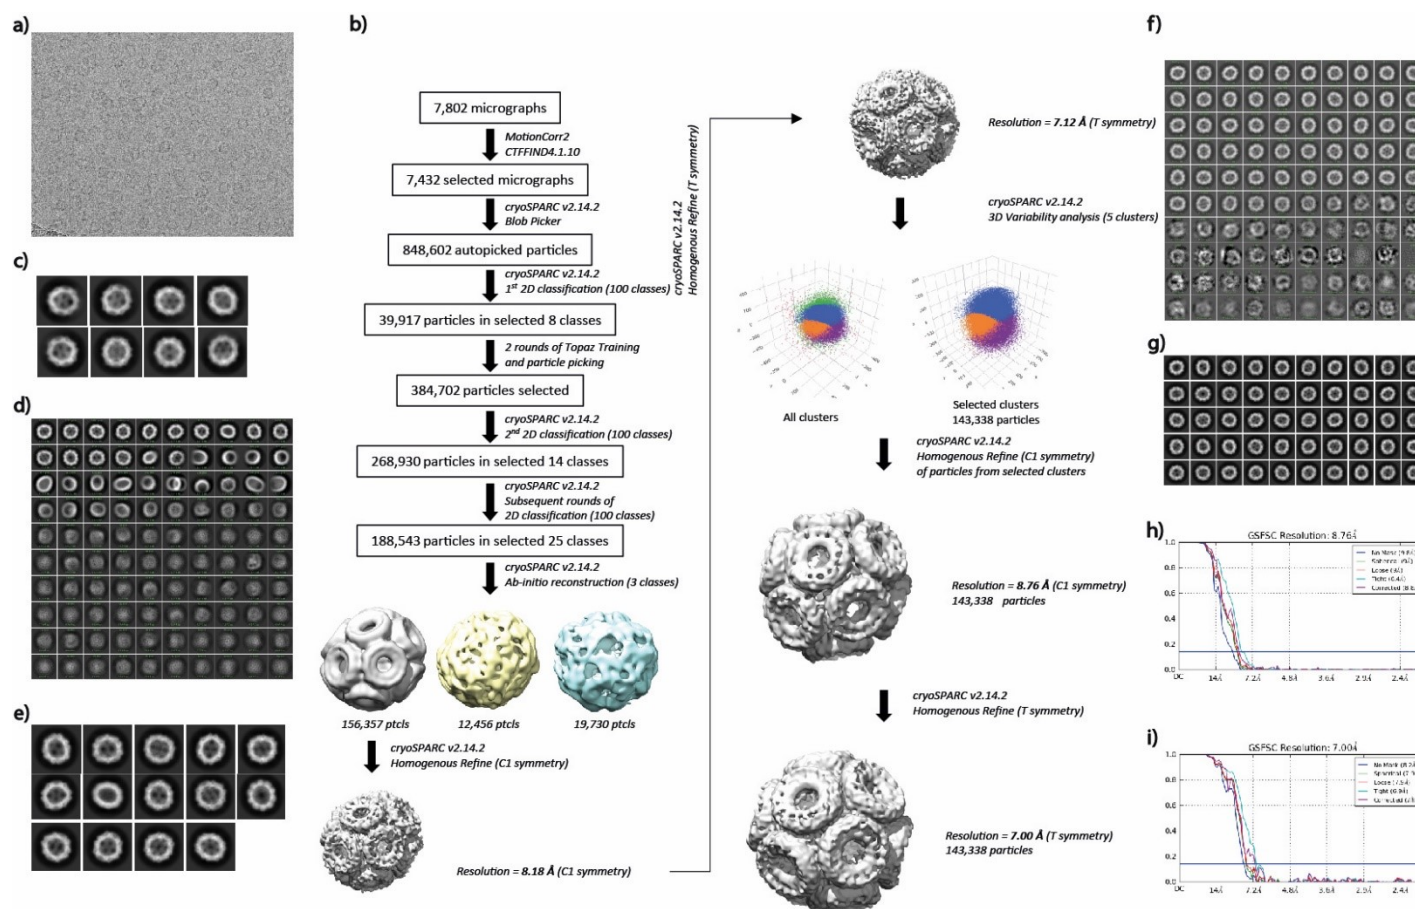

**Fig. S4. Procedure for cryo-EM reconstruction of Au-TPPMS 12-mer TRAP cage.** (a), representative micrograph. Scale bar – 50 nm. (b), Summary of the image processing procedure (see Methods). (c), selected 2D class averages from first reference-free 2D classification in cryoSPARC v2.14.2 used to train Topaz<sup>19,20</sup> (d), 2D class averages from reference-free 2D classification in cryoSPARC v2.14.2. (e), first selected twelve 2D classes. (f), final 2D class averages from reference-free 2D classification in cryoSPARC v2.14.2. (g), Final 2D classes selected for 3D reconstruction. (h), FSC correlation curve for structure refined in C1 symmetry. (i), FSC correlation curve for structure refined in tetrahedral symmetry (T).

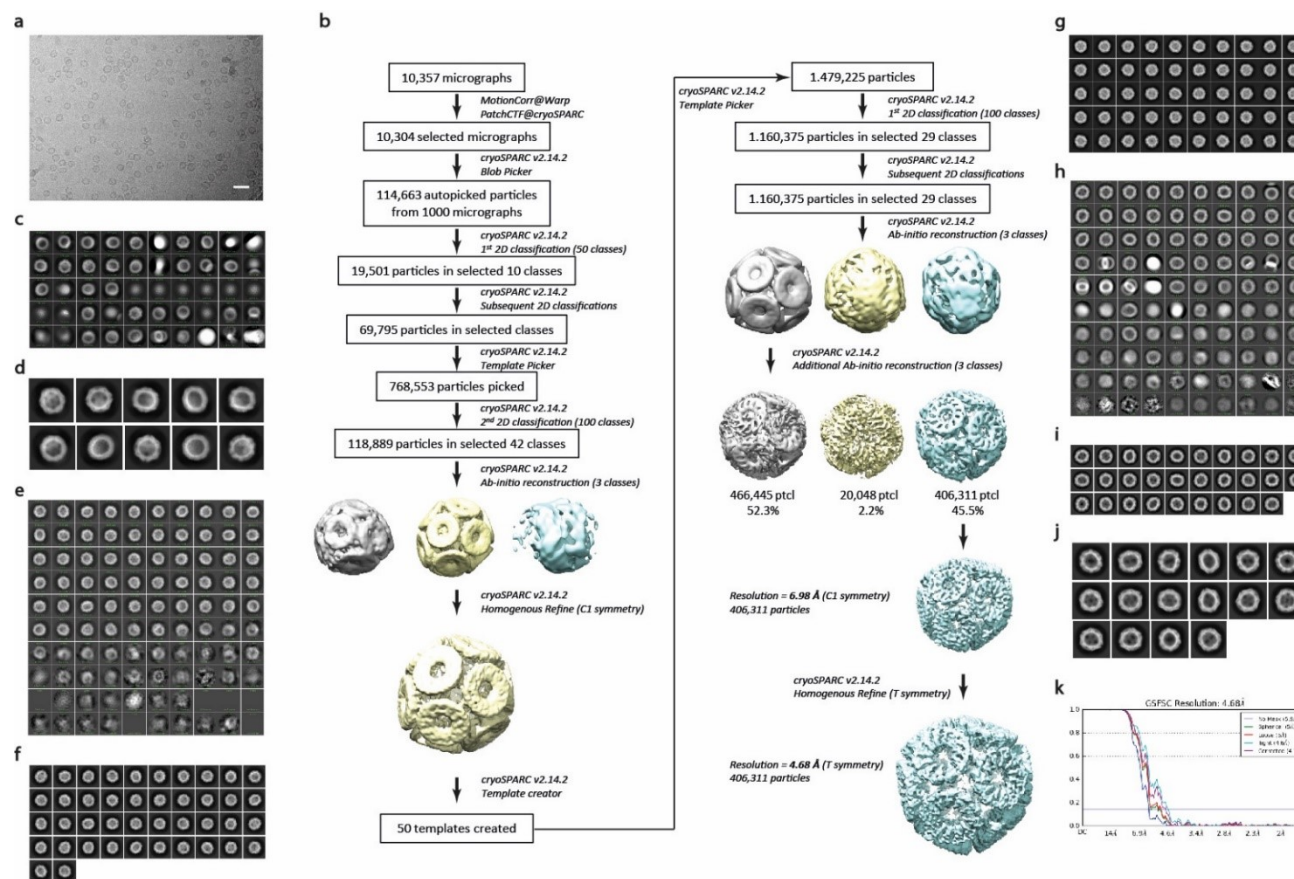

**Fig. S5. Procedure for cryo-EM reconstruction of Au-TPPMS <sup>11</sup>TRAP<sub>12</sub>.** **(a)**, representative micrograph. Scale bar – 50 nm. **(b)**, Summary of the image processing procedure (see Methods). **(c)**, results of the first 2D classification. **(d)**, selected 2D class averages from first reference-free 2D classification in cryoSPARC v2.14.2 used for 1<sup>st</sup> template pick **(e)**, 2D class averages from reference-free 2D classification in cryoSPARC v2.14.2. after 1<sup>st</sup> template pick **(f)**, 2D classes selected for the 1<sup>st</sup> Ab-initio reconstruction. **(g)**, 50 back projections created from initial 3D volume. **(h)**, result of the 2D classification after template picking from back-projection-create 2D classes. **(i)**, the first selection of 2D classes. **(j)**, final 2D classes used for generation of a 3D map. **(k)**, FSC curve with indicated resolution at 0.143 thresholds for the final refinement in T symmetry.

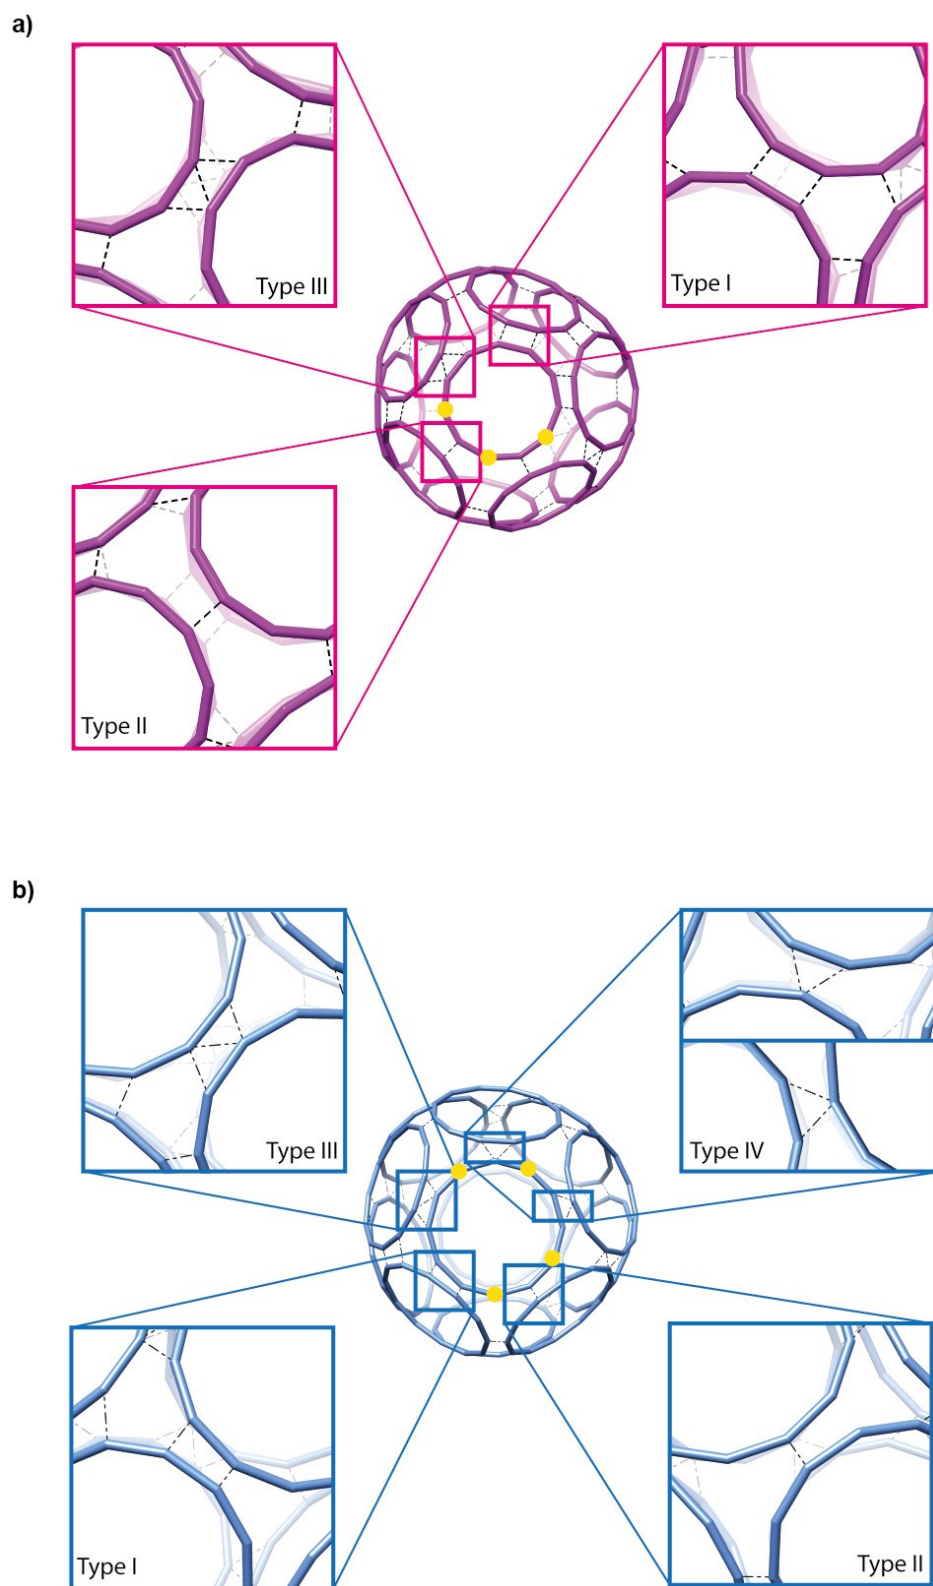

**Fig. S6. Connection Maps between rings in TRAP-cages.** Images are wireframe schematics showing cages made from **(a)**, 11mer rings and **(b)**, 12mer rings. Au(I)-mediated bonds between cysteines on opposing rings are indicated by dotted lines. In each case, in the central, representative ring, unbonded cysteines are indicated by a yellow circle.

a)

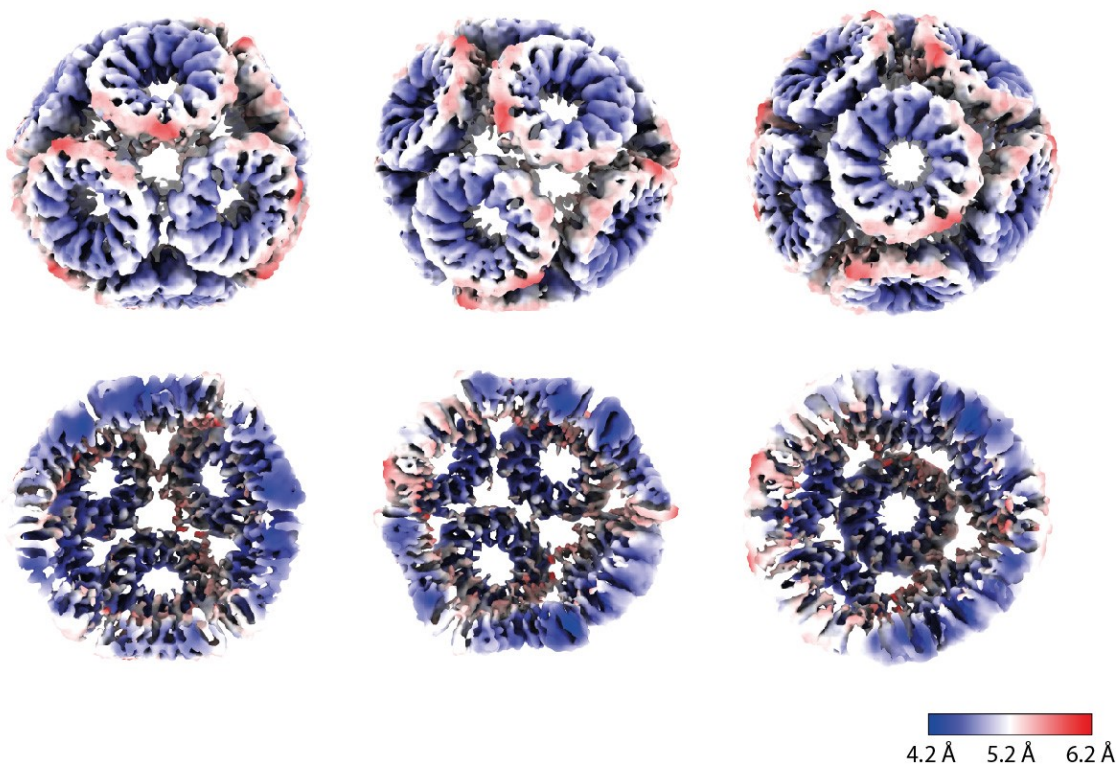

b)

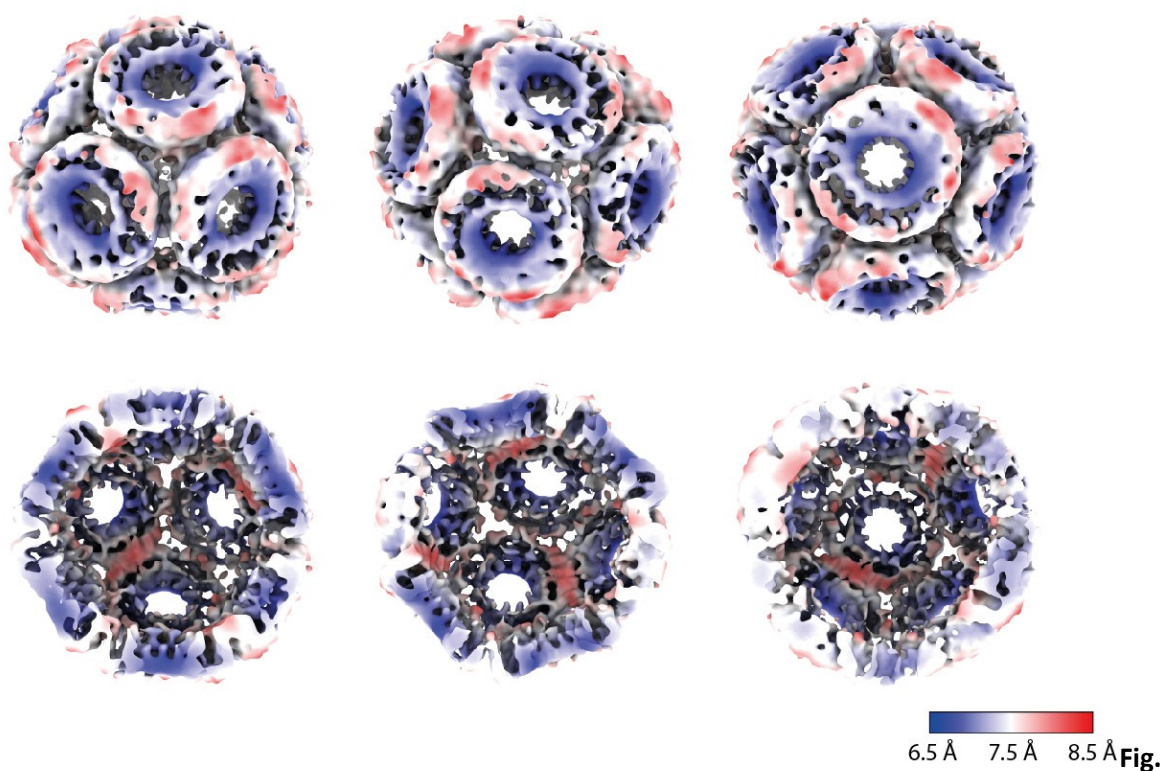

**S7. Local resolution estimation of 12-ring TRAP-cages. (a)**, local resolution of  $^{11}\text{TRAP}_{12}$  cage shown in three different views (top panel) together with respective cross-sections (bottom panel) and **(b)**, local resolution of  $^{12}\text{TRAP}_{12}$  cage shown in three different views (top panel) together with respective cross-sections (bottom panel); scale bars showing the range of the resolution for each structure.

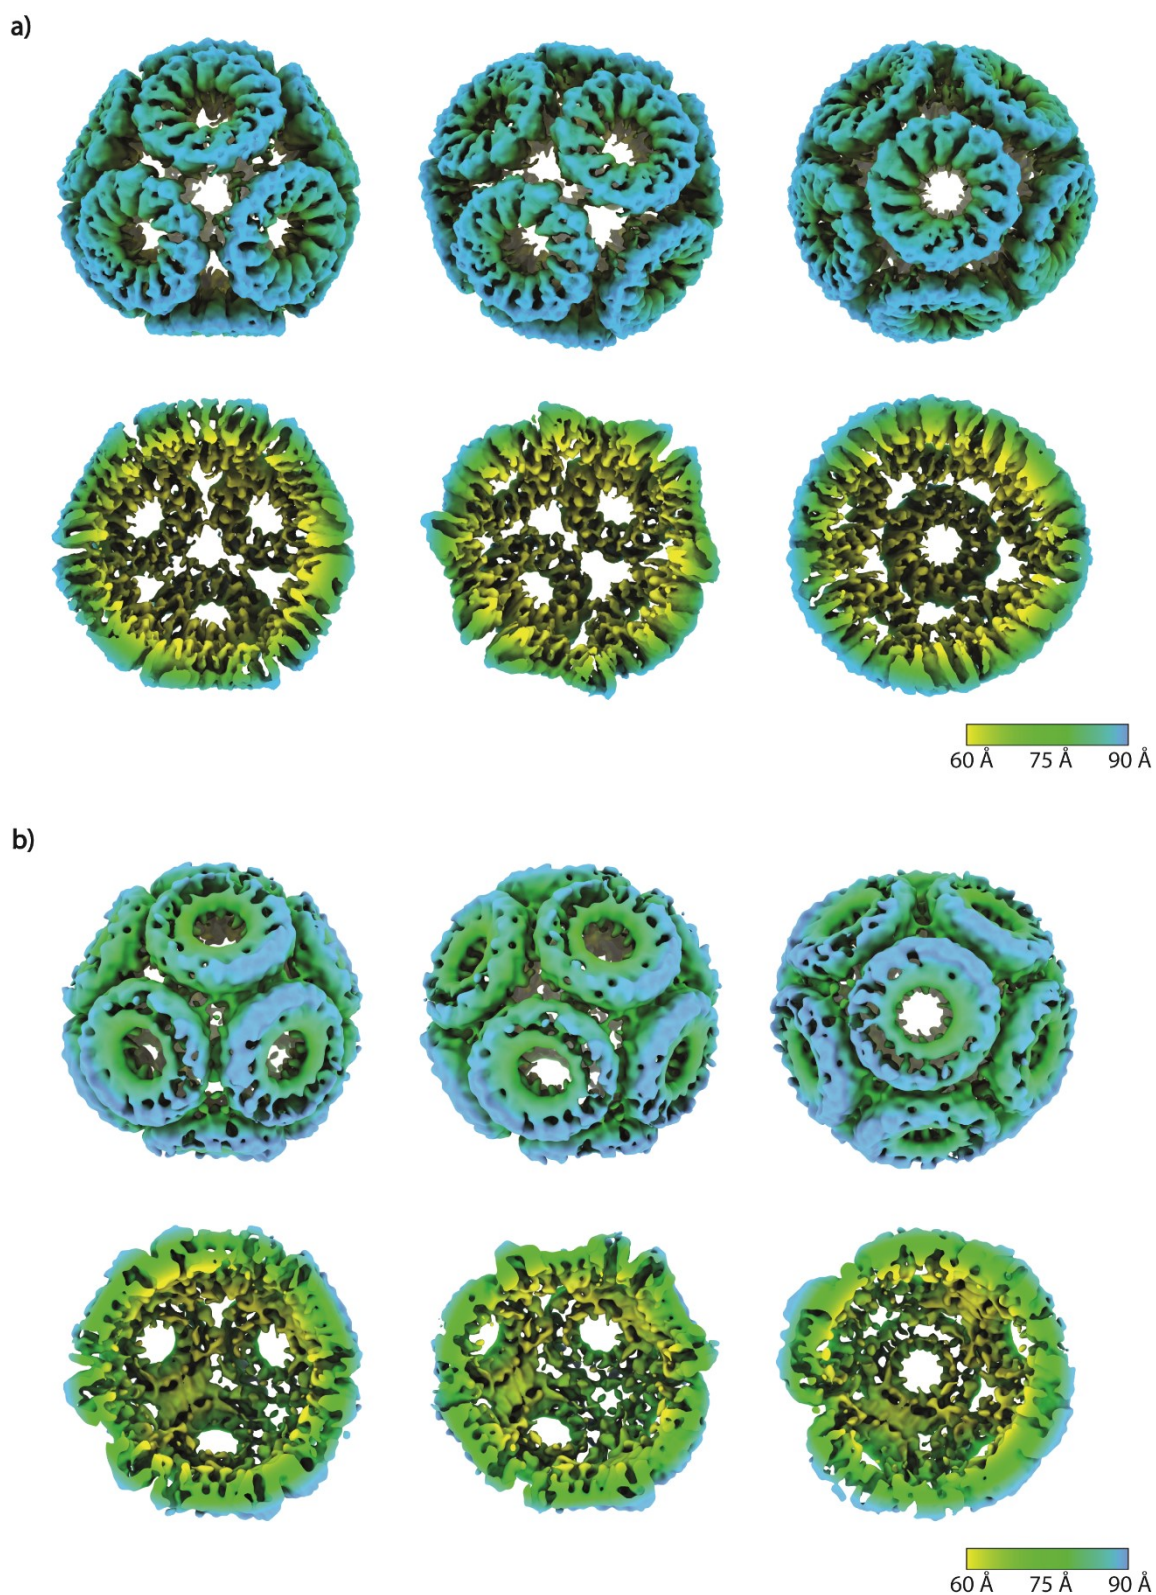

**Fig. S8. Radius colouring of 12-ring TRAP cages.** (a), radius coloured  $^{11}\text{TRAP}_{12}$  cage shown in three different views (top panel) together with respective cross-sections (bottom panel) and (b), radius coloured  $^{12}\text{TRAP}_{12}$  cage shown in three different views (top panel) together with respective cross-sections (bottom panel); scale bars showing the range of the resolution for each structure.
